# Supplementary material
Source: publisher figshare collection journal article supplement (https://geolsoc.figshare.com/ndownloader/files/5423786)
Supplement: Supplementary file 1 [file 5423786]

Bar       Type,Data Points,Length [m],,,,,,,Width [m],,,,,,,Width:Length Ratio,,,,,,
,,Min.,Max.,Mean,"Std.
Dev.","1st
Quartile",Median,"3rd
Quartile",Min.,Max.,Mean,"Std.
Dev.","1st
Quartile",Median,"3rd
Quartile",Min.,Max.,Mean,"Std.
Dev.","1st
Quartile",Median,"3rd
Quartile"
mid-channel bar,452,16,8805,550,1164.45,84.75,237.50,492.25,5,2885,157,341.65,22.00,64.50,144.50,0.092,0.488,0.278,0.066,0.227,0.276,0.324
point bar,215,28,1524,301,206.71,180.00,248.00,331.50,12,421,85,54.13,55.00,72.00,98.50,0.139,0.497,0.299,0.081,0.235,0.297,0.367
bank-attached bar,314,17,3449,594,525.92,179.25,480.50,827.75,6,699,147,134.60,42.00,115.00,207.75,0.125,0.472,0.249,0.062,0.203,0.243,0.286
"lateral
bar",22,56,5434,768,1308.90,88.00,415.00,487.50,12,1646,225,381.04,27.00,118.50,168.00,0.188,0.419,0.299,0.061,0.254,0.292,0.339
